# Supplementary material for: Chiral salenCo(iii) complexes with bulky substituents as catalysts for stereoselective alternating copolymerization of racemic propylene oxide with carbon dioxide and succinic anhydride
Source: Royal Society of Chemistry journal article supplement (doi:10.1039/d0py01562h), 2021-01-01
Supplement: d0py01562h1.pdf [file d0py01562h1.pdf]

## Supporting Information

### Chiral SalenCo(III) Complexes with Bulky Substituents as Catalysts for Stereoselective Alternating Copolymerization of Racemic Propylene Oxide with Carbon Dioxide and Succinic Anhydride

Zhou Wang and Ying Mu\*

*State Key Laboratory for Supramolecular Structure and Materials, School of Chemistry, Jilin University, 2699 Qianjin Street, Changchun 130012, People's Republic of China.*

#### Contents

1. Synthesis and characterizations of phenols **1a-d** (S2-S3)
2. Synthesis and characterizations of salicylaldehydes **2a-d** (S4-S5)
3. <sup>1</sup>H NMR spectra of salen ligands **3a-d** (S6-S7)
4. <sup>1</sup>H NMR and HRMS spectra of salenCo(III) complexes (S8-S13)
5. <sup>13</sup>C NMR spectra of the PPCs and PPS (S14)
6. Chiral GC chromatograms of the resulting PC and propanediol diacetate (S15-S16)
7. Kinetic study for the copolymerization of PO and SA (S17)
8. NMR spectra of the block polymers (S18-S19)
9. Peaks found in MALDI-TOF-MS spectra and related polymer chains (S20-S21)
10. MALDI-TOF-MS spectra of the polymers (S22)

**1. Synthesis and characterizations of phenols with bulky substituents 1a-d**  
4-*tert*-butyl-2-substitutedphenols **1a**, **1b**, **1c** and **1d** were prepared according to the literature procedures.

4-*tert*-Butyl-2-(2,3-dimethylbut-2-yl)phenol (**1a**)

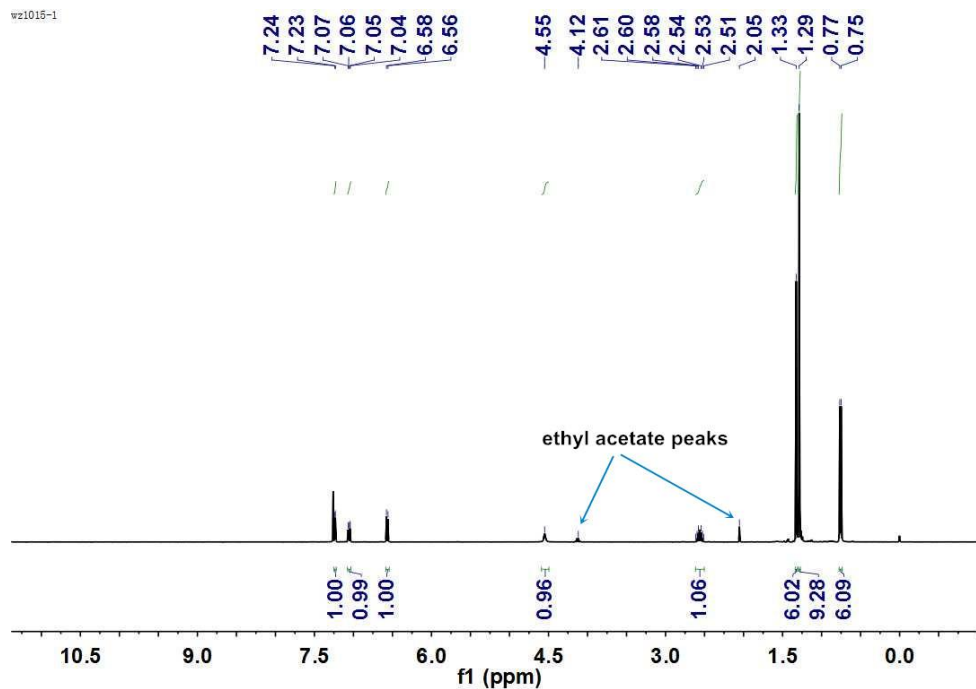

Figure S1. <sup>1</sup>H NMR (400 MHz, CDCl<sub>3</sub>, 298K) spectrum of **1a**.

4-*tert*-Butyl-2-(2-phenylpropan-2-yl)phenol (**1b**)

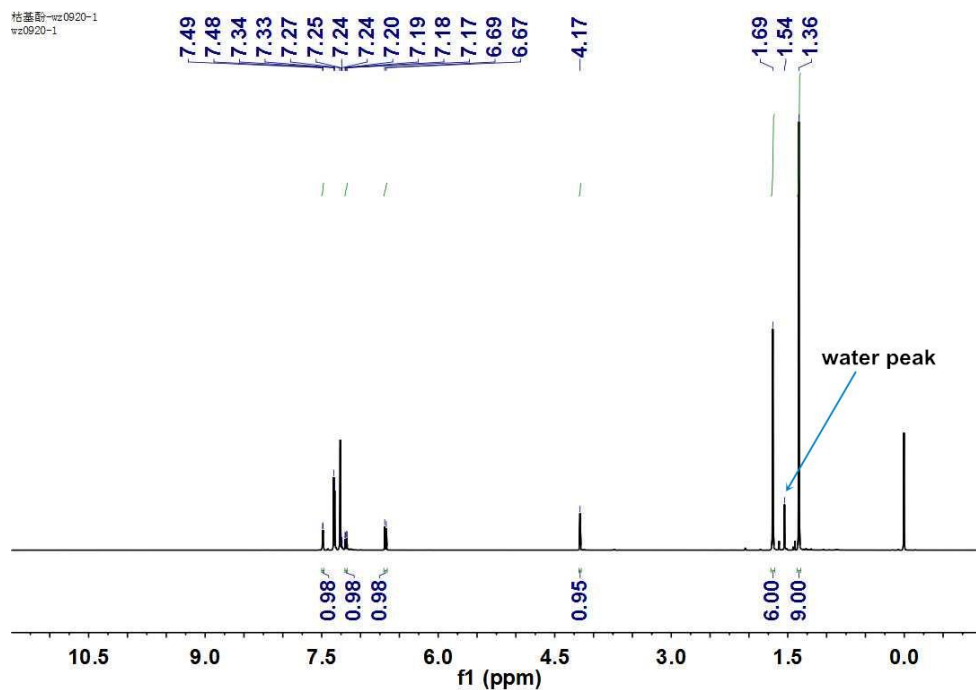

Figure S2. <sup>1</sup>H NMR (400 MHz, CDCl<sub>3</sub>, 298K) spectrum of **1b**.

4-*tert*-butyl-2-(1,1-diphenylethyl)phenol (**1c**)

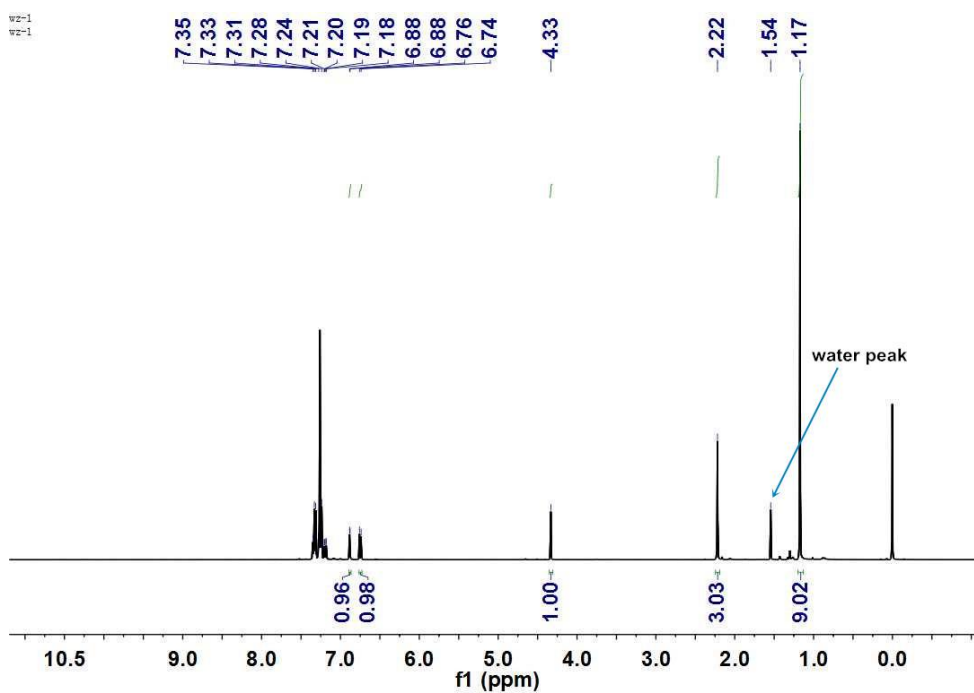

Figure S3.  $^1\text{H}$  NMR (400 MHz,  $\text{CDCl}_3$ , 298K) spectrum of **1c**.

4-*tert*-butyl-2-(trityl)phenol (**1d**)

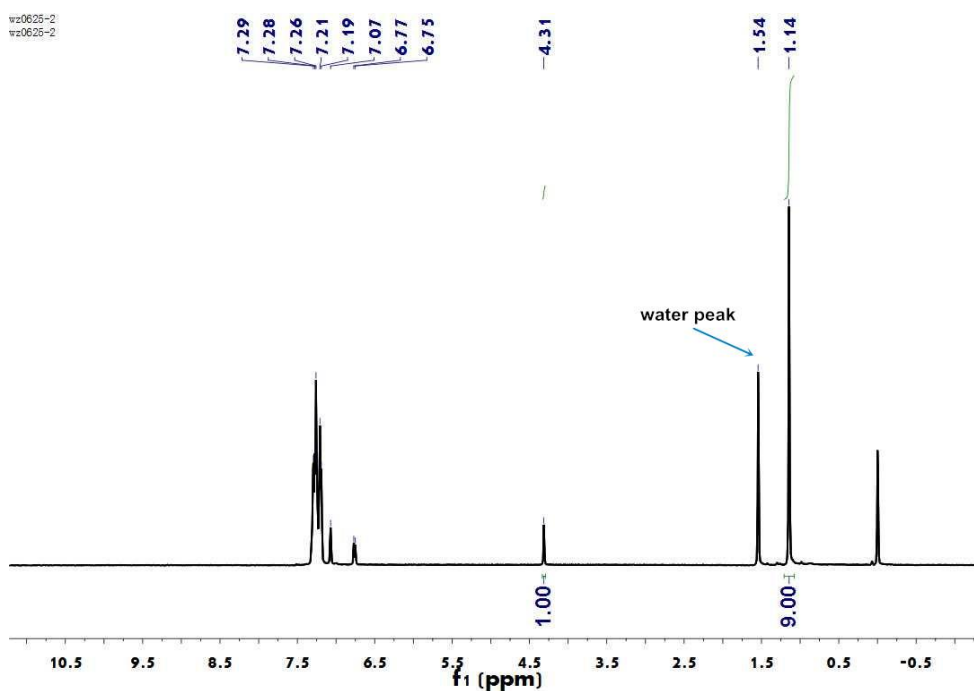

Figure S4.  $^1\text{H}$  NMR (400 MHz,  $\text{CDCl}_3$ , 298K) spectrum of **1d**.

## 2. Synthesis and characterizations of salicylaldehydes 2a-d

The corresponding salicylaldehydes were prepared according to the literature procedures.<sup>4</sup>

### 5-*tert*-butyl-3-(2,3-dimethylbutan-2-yl)-2-hydroxybenzaldehyde (**2a**)

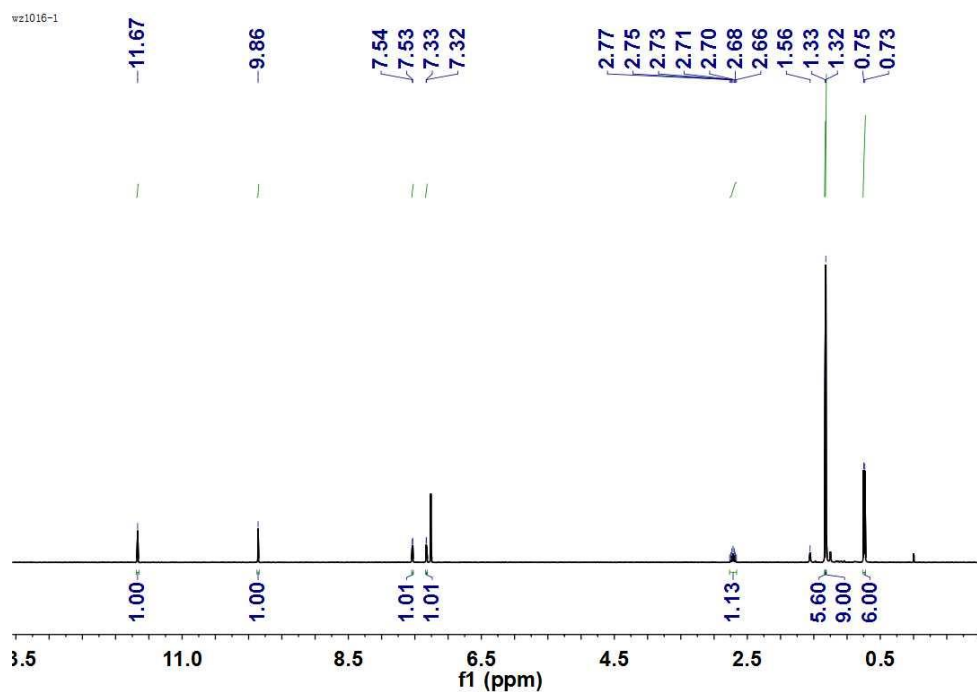

Figure S5. <sup>1</sup>H NMR (400 MHz, CDCl<sub>3</sub>, 298K) spectrum of **2a**.

### 5-*tert*-butyl-2-hydroxy-3-(2-phenylpropan-2-yl)benzaldehyde (**2b**)

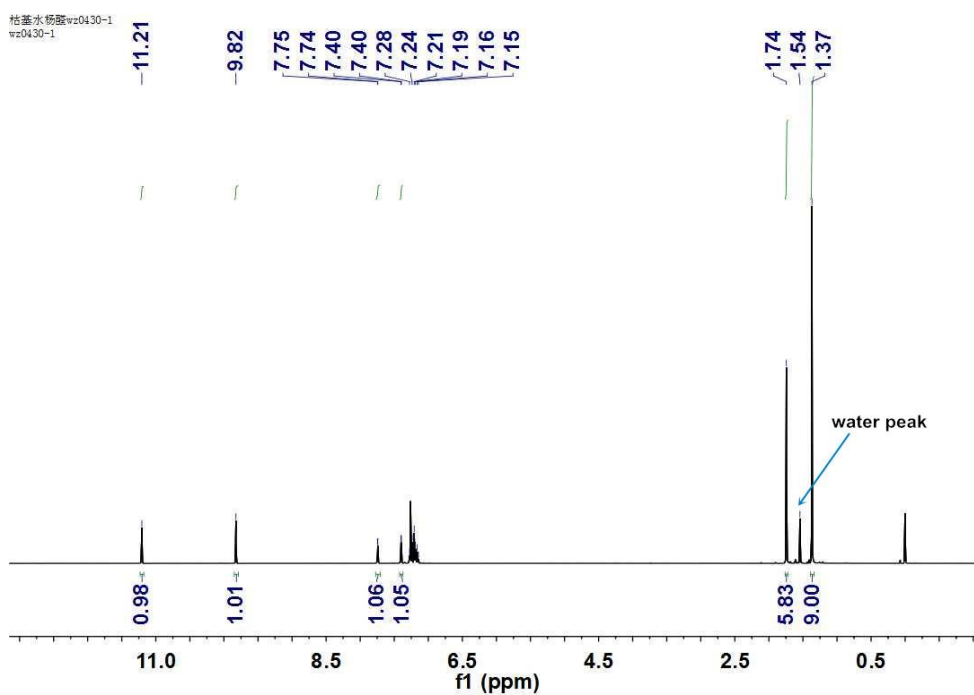

Figure S6. <sup>1</sup>H NMR (400 MHz, CDCl<sub>3</sub>, 298K) spectrum of **2b**.

5-*tert*-butyl-3-(1,1-diphenylethyl)-2-hydroxybenzaldehyde (**2c**)

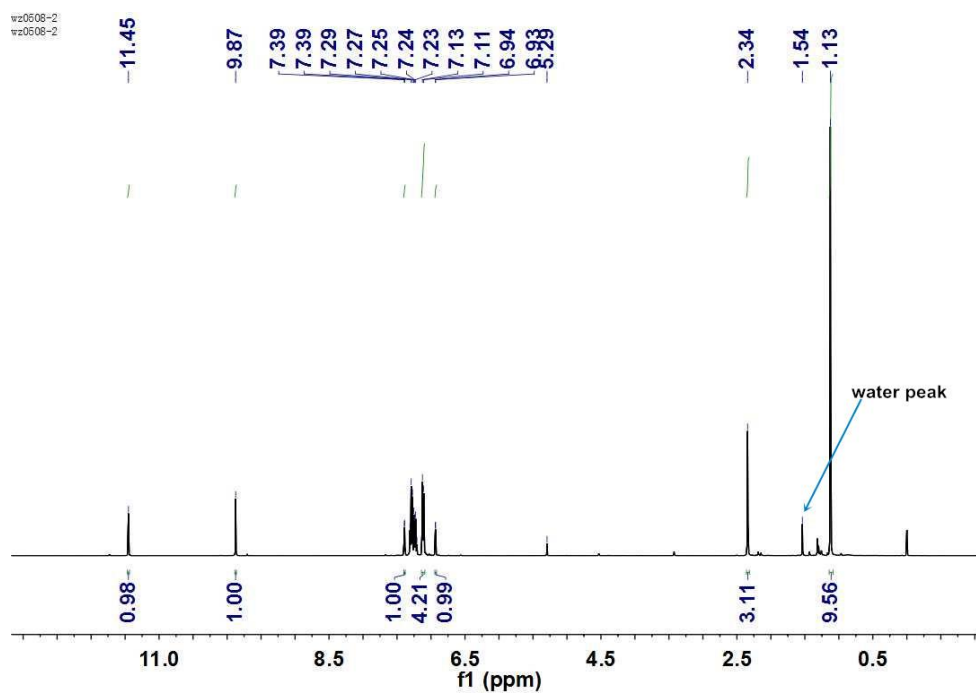

Figure S7.  $^1\text{H}$  NMR (400 MHz,  $\text{CDCl}_3$ , 298K) spectrum of **2c**.

5-*tert*-butyl-3-(trityl)-2-hydroxybenzaldehyde (**2d**)

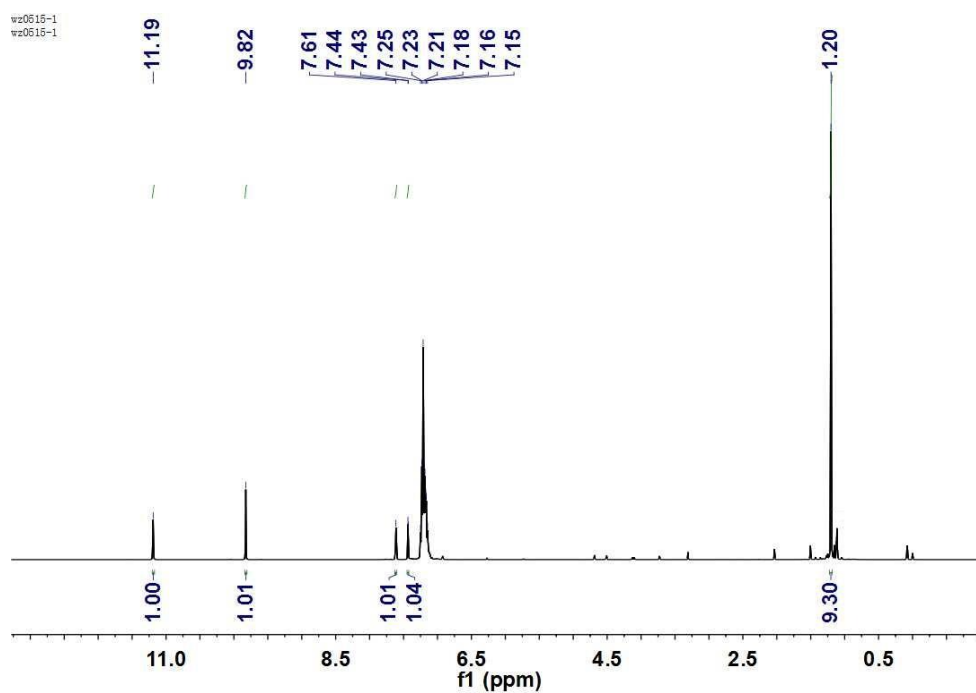

Figure S8.  $^1\text{H}$  NMR (400 MHz,  $\text{CDCl}_3$ , 298K) spectrum of **2d**.

### 3. $^1\text{H}$ NMR spectra of salen ligands 3a-d

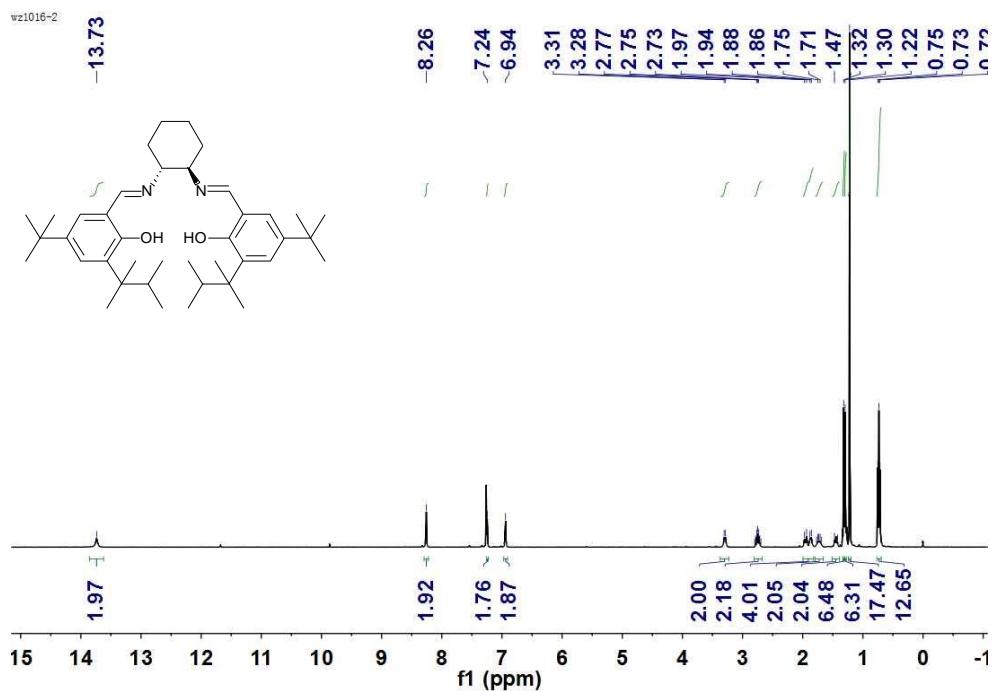

Figure S9.  $^1\text{H}$  NMR (400 MHz,  $\text{CDCl}_3$ , 298K) spectrum of **3a**.

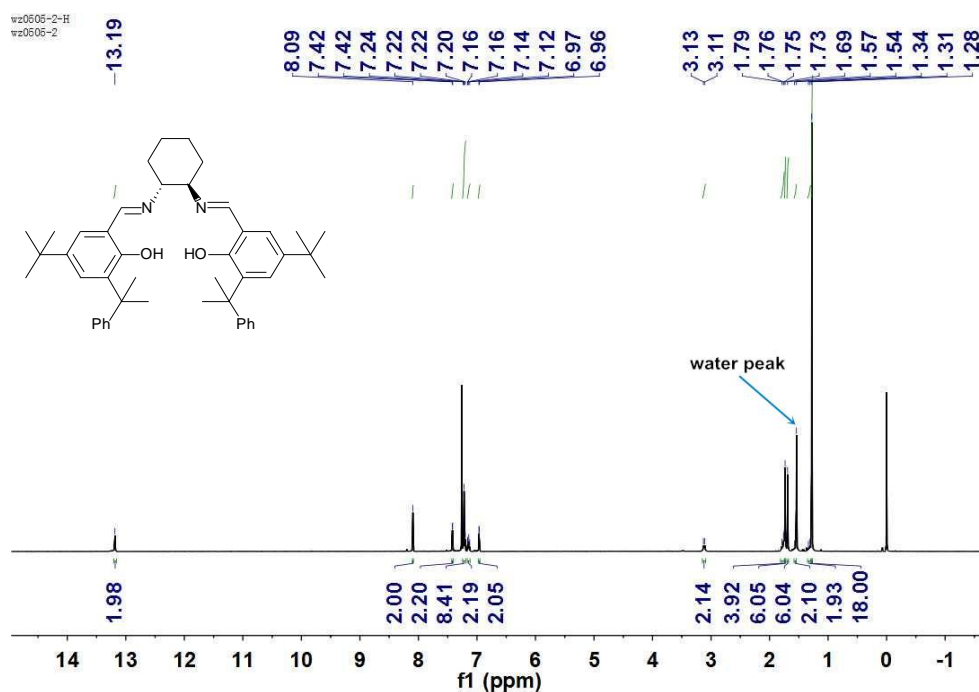

Figure S10.  $^1\text{H}$  NMR (400 MHz,  $\text{CDCl}_3$ , 298K) spectrum of **3b**.

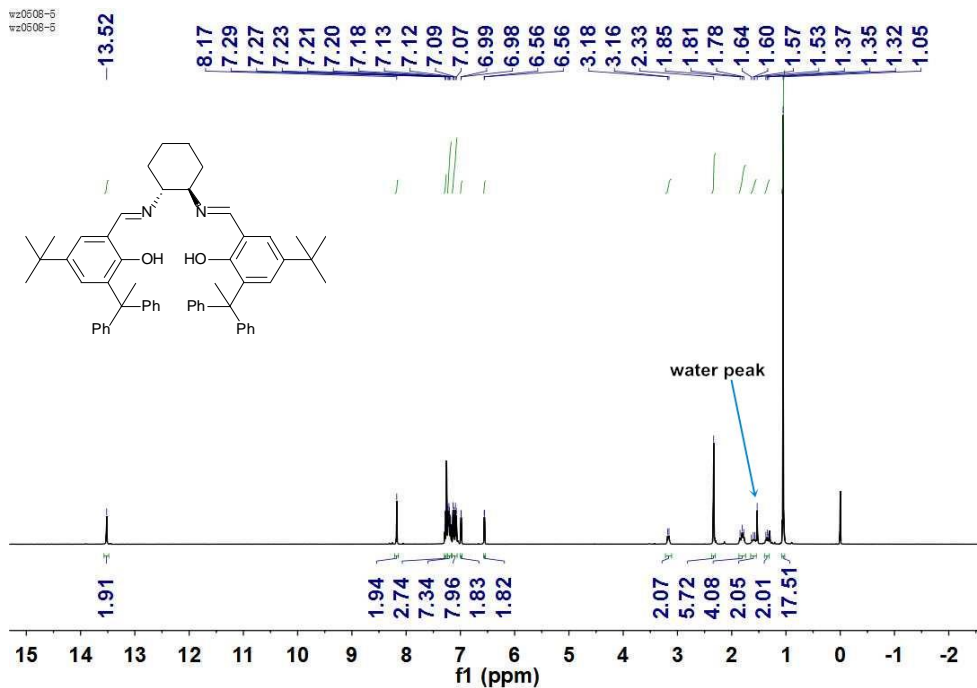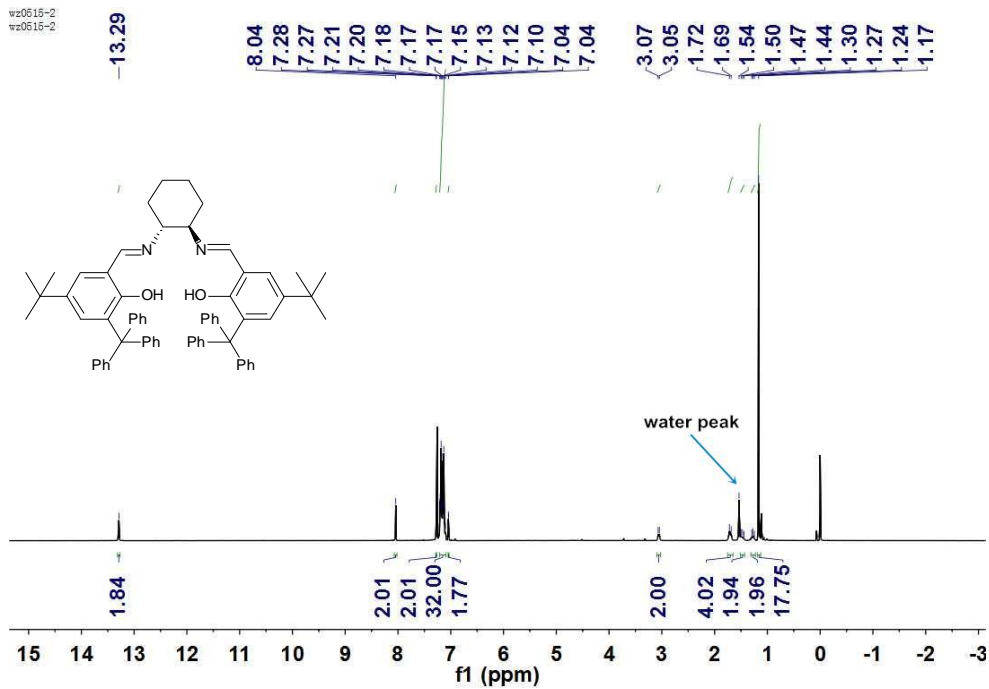

#### 4. $^1\text{H}$ NMR and HRMS spectra of salenCo(III)

salenCoOAc (**4a**, **4b**, **4c**)

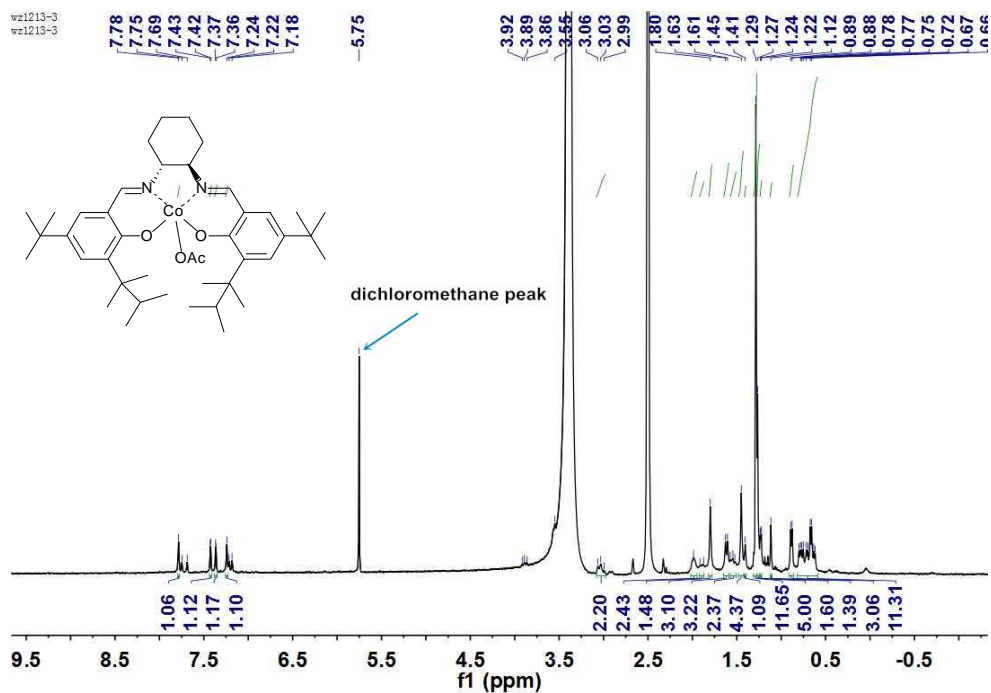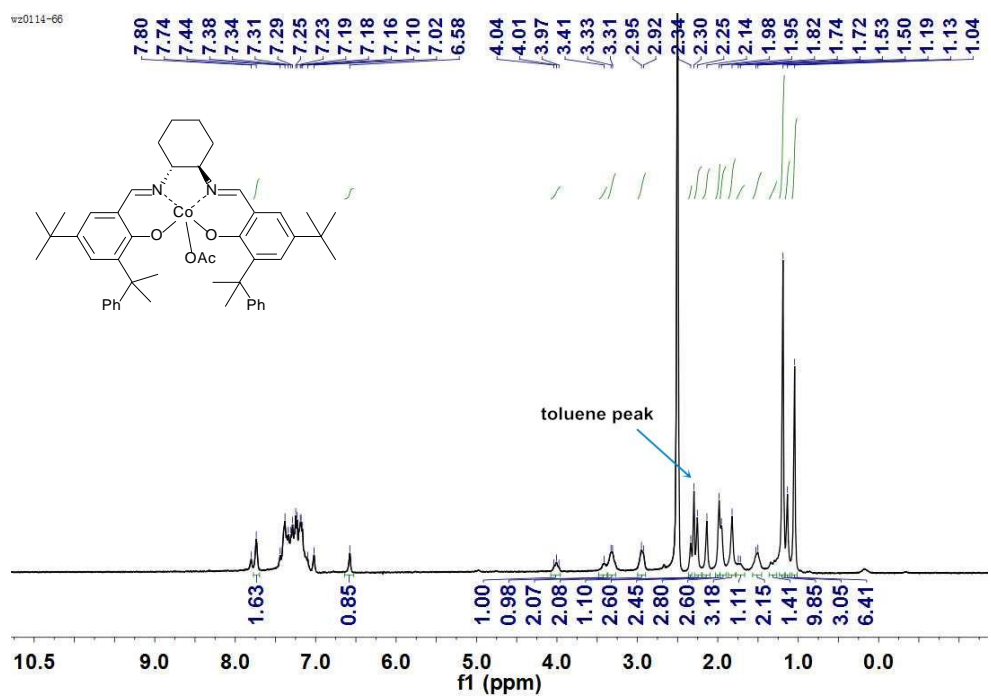



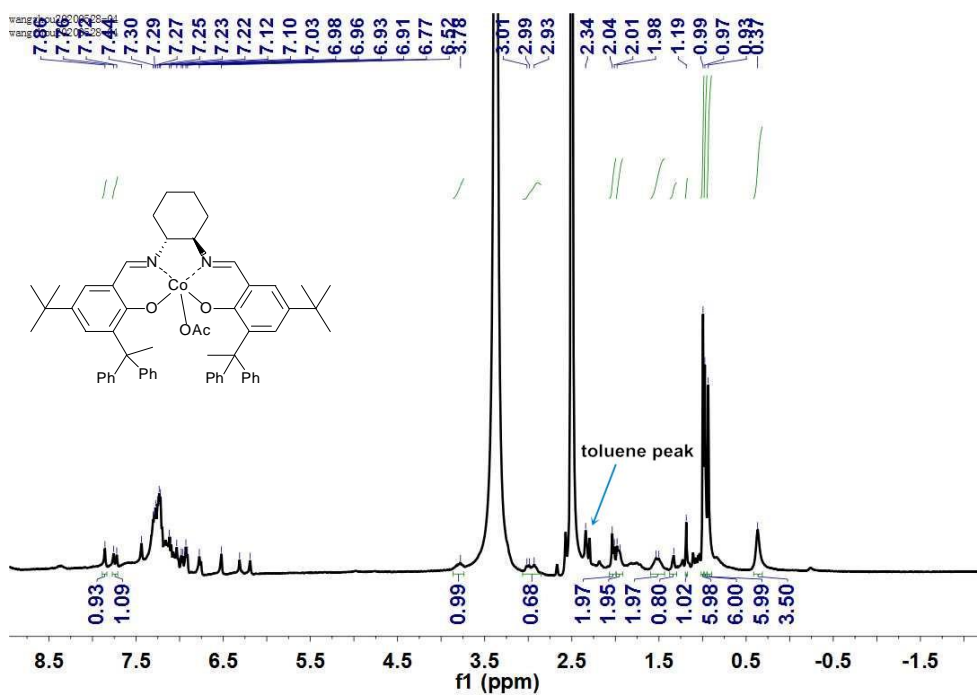

Figure S15.  $^1\text{H}$  NMR (400 MHz,  $\text{DMSO-}d_6$ , 298K) spectrum of **4c**.

salenCoDNP (**5a**, **5b**, **5c**)

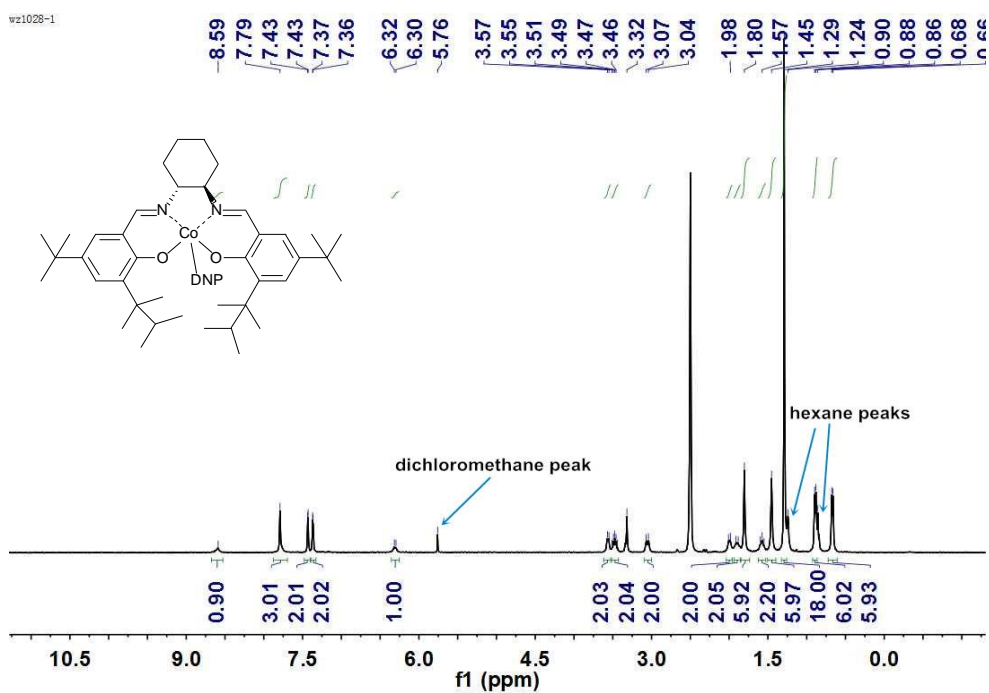

Figure S16.  $^1\text{H}$  NMR (400 MHz,  $\text{DMSO-}d_6$ , 298K) spectrum of **5a**.

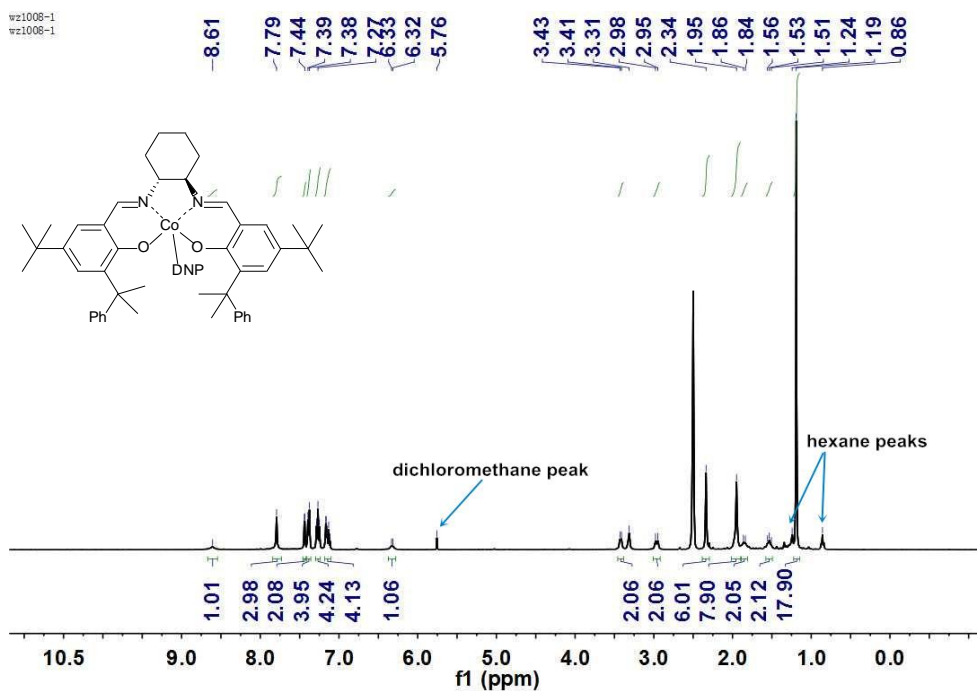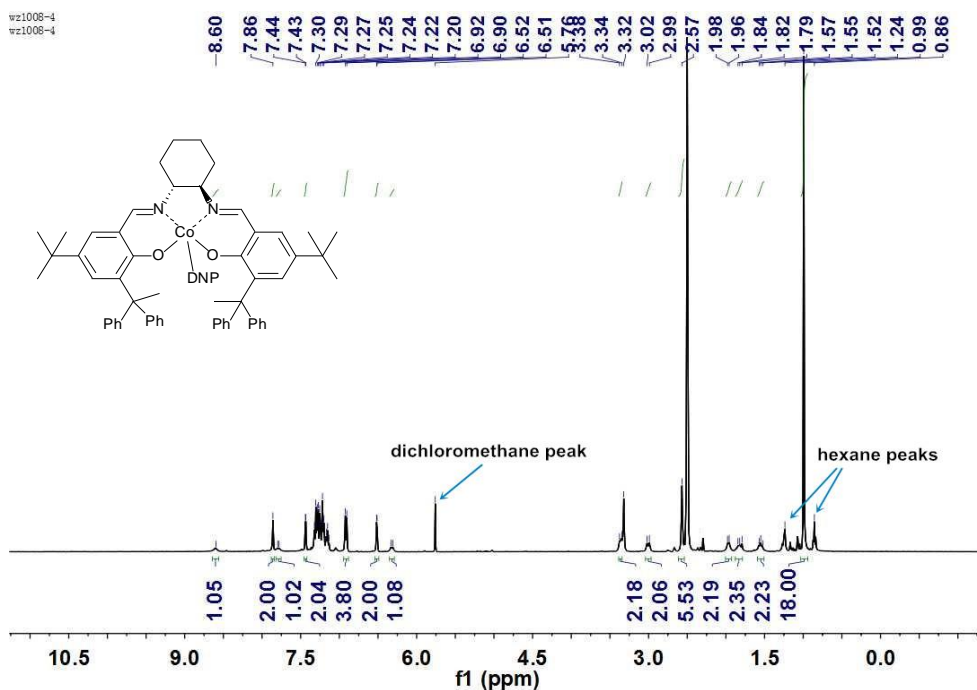

salenCoBr (**6a**, **6b**, **6c**)

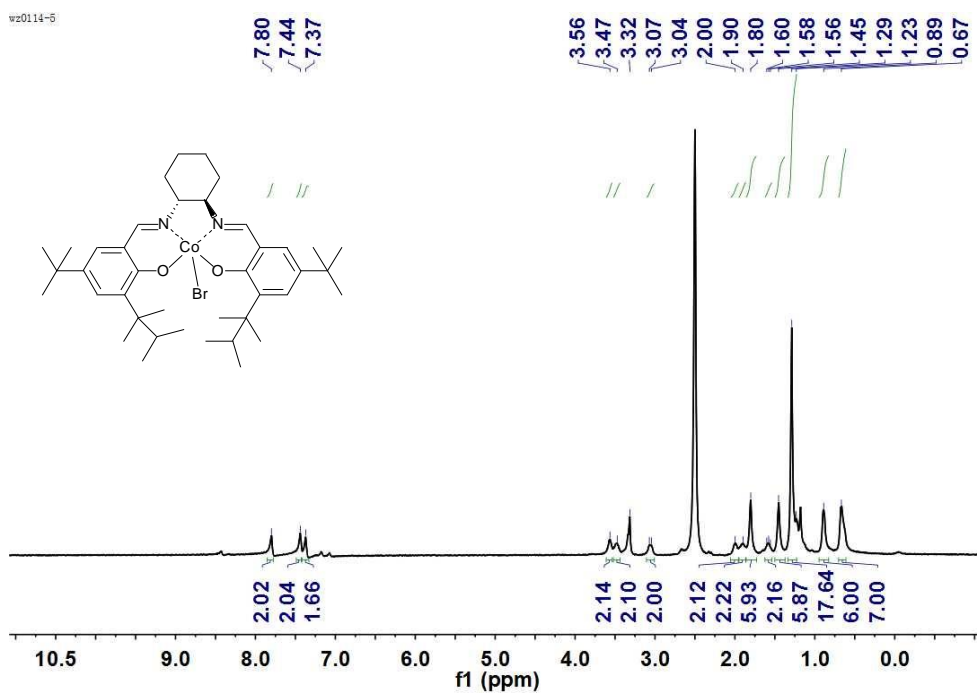

Figure S19.  $^1\text{H}$  NMR (400 MHz,  $\text{DMSO-}d_6$ , 298K) spectrum of **6a**.

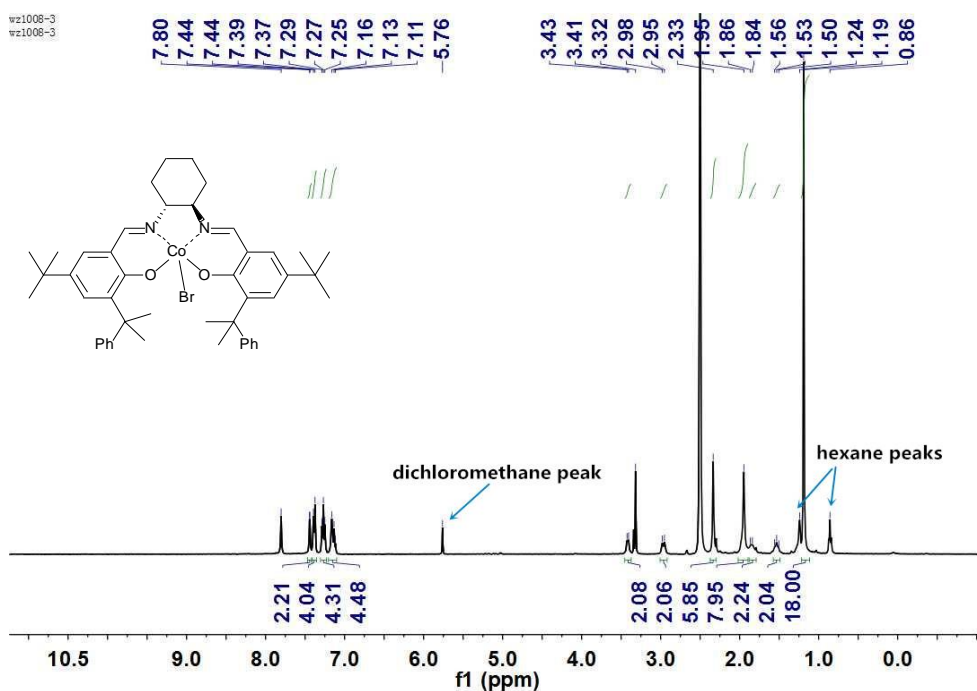

Figure S20.  $^1\text{H}$  NMR (400 MHz,  $\text{DMSO-}d_6$ , 298K) spectrum of **6b**.

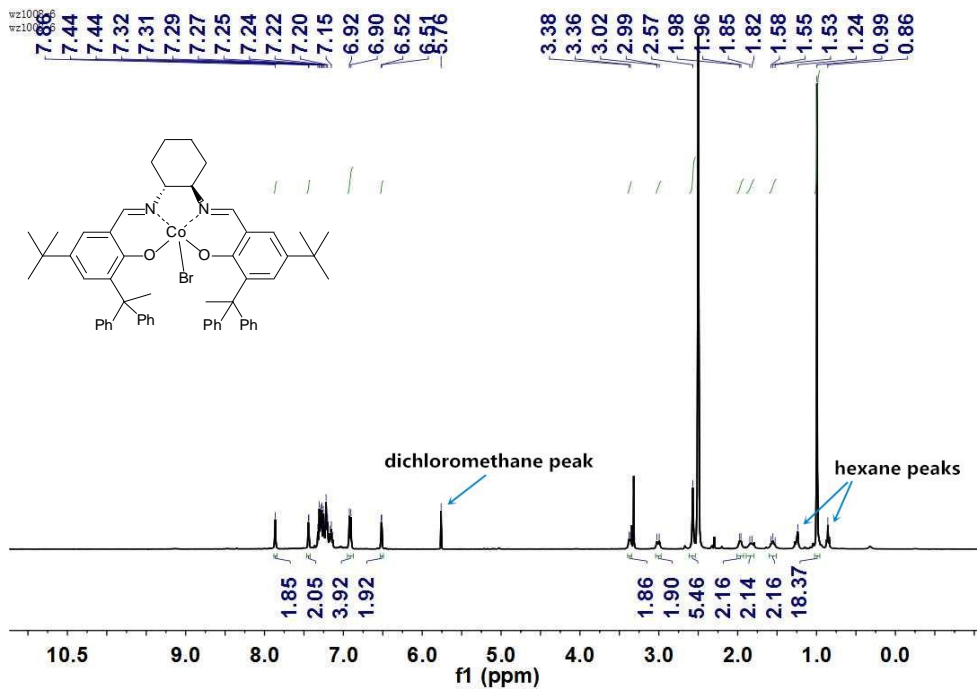

Figure S21. <sup>1</sup>H NMR (400 MHz, DMSO-*d*<sub>6</sub>, 298K) spectrum of **6c**.

salenCoDNP (**5a**, **5b**, **5c**)

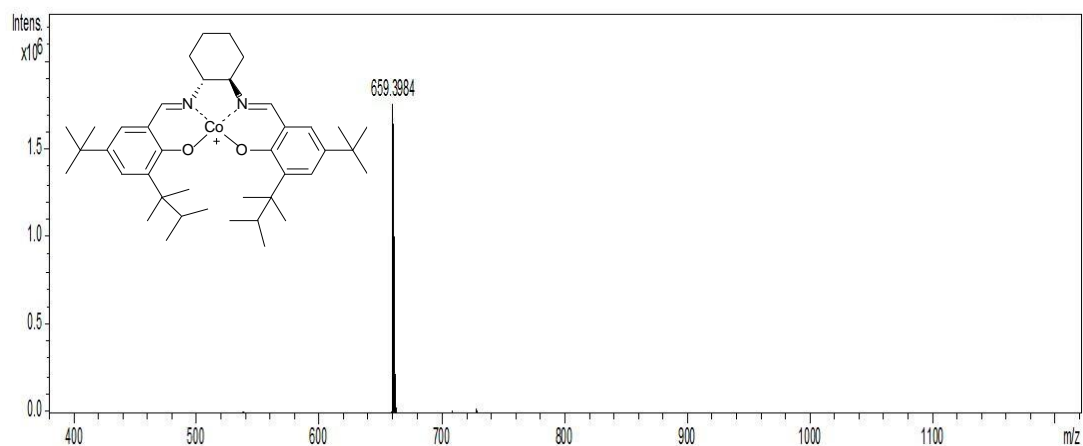

Figure S22. HRMS spectrum of **5a**.

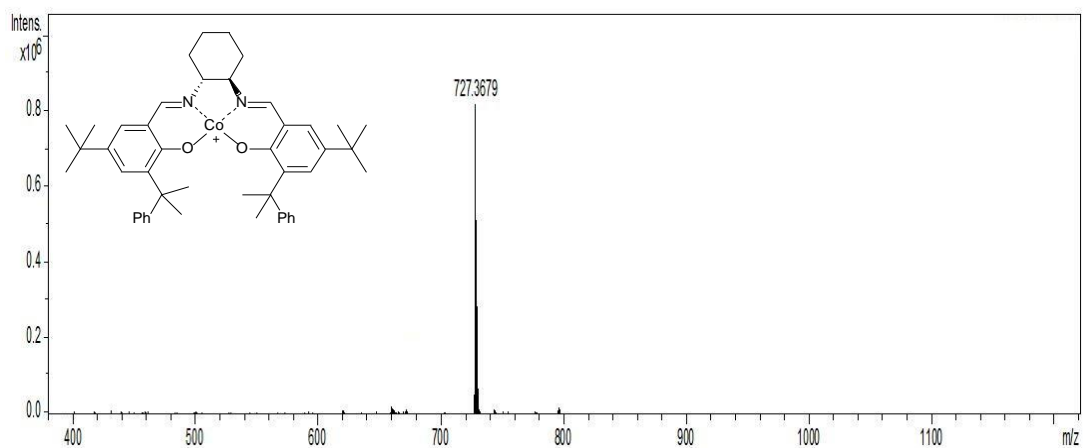

Figure S23. HRMS spectrum of **5b**.

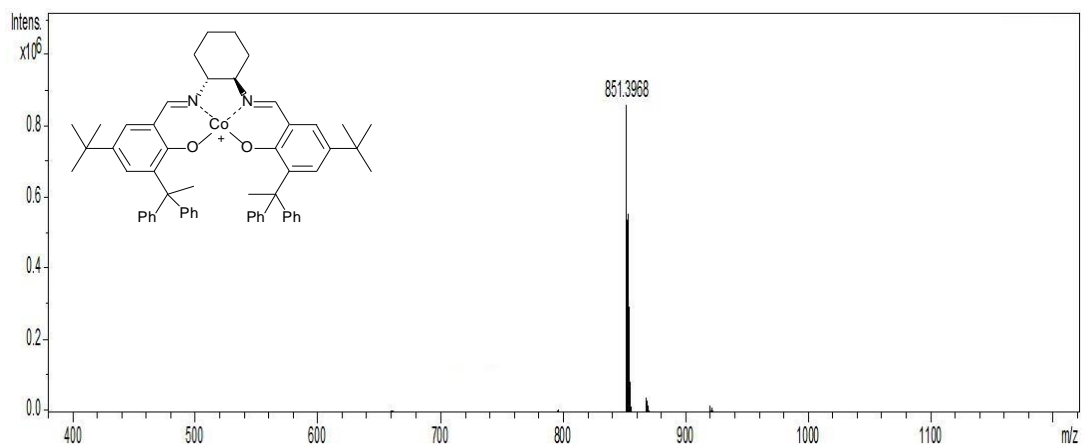

Figure S24. HRMS spectrum of **5c**.

## 5. $^{13}\text{C}$ NMR spectra of the PPCs and PPS

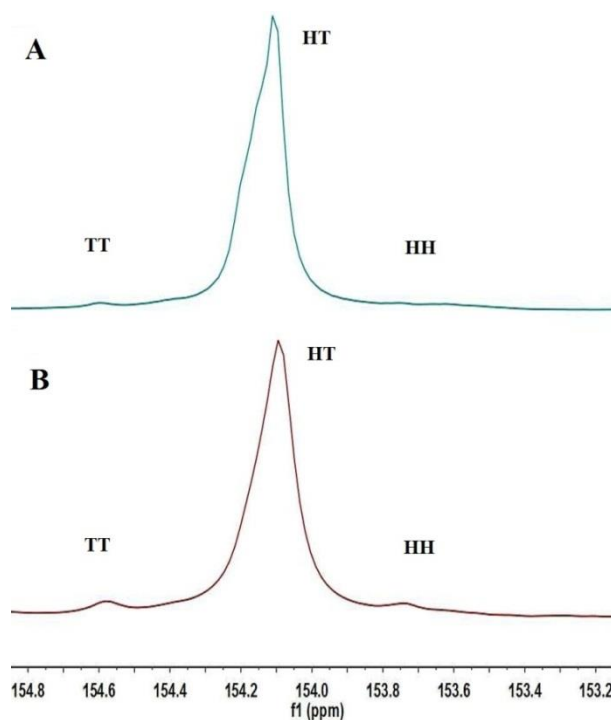

**Figure S25.** Carbonyl region of the  $^{13}\text{C}$  NMR (100 MHz,  $\text{CDCl}_3$ , 298K) spectra of PPC generated with the use of **5c**/PPNDNP at 0 °C (A) and PPC generated with the use of **5c**/DMAP at 25 °C (B).

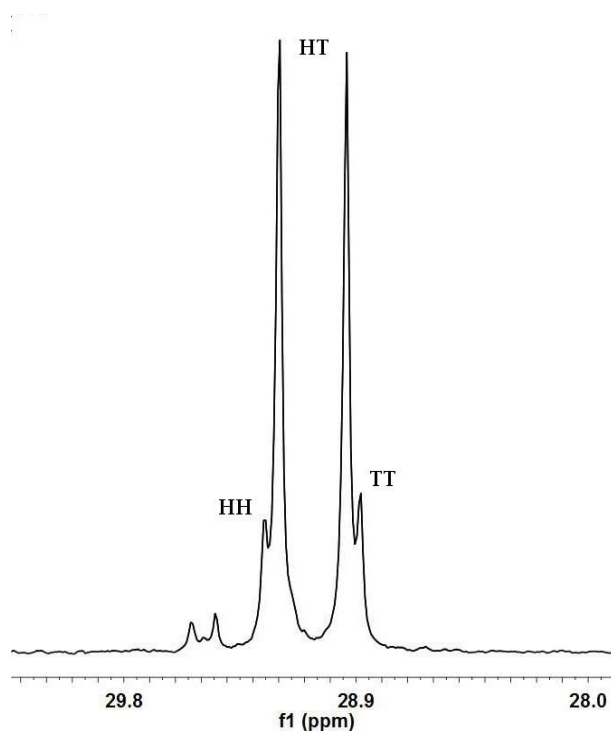

**Figure S26.** Methylene region of the  $^{13}\text{C}$  NMR (100 MHz,  $\text{CDCl}_3$ , 298K) spectrum of PPS generated with the use of **5c**/PPNDNP at 30 °C.

## 6. Chiral GC chromatograms

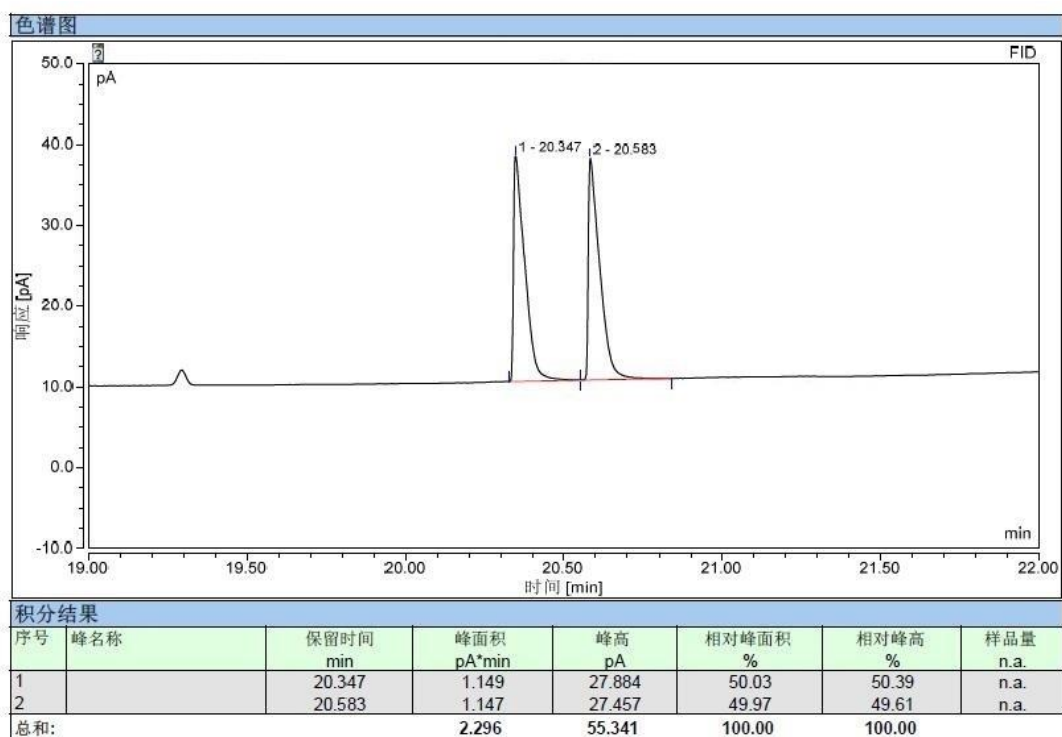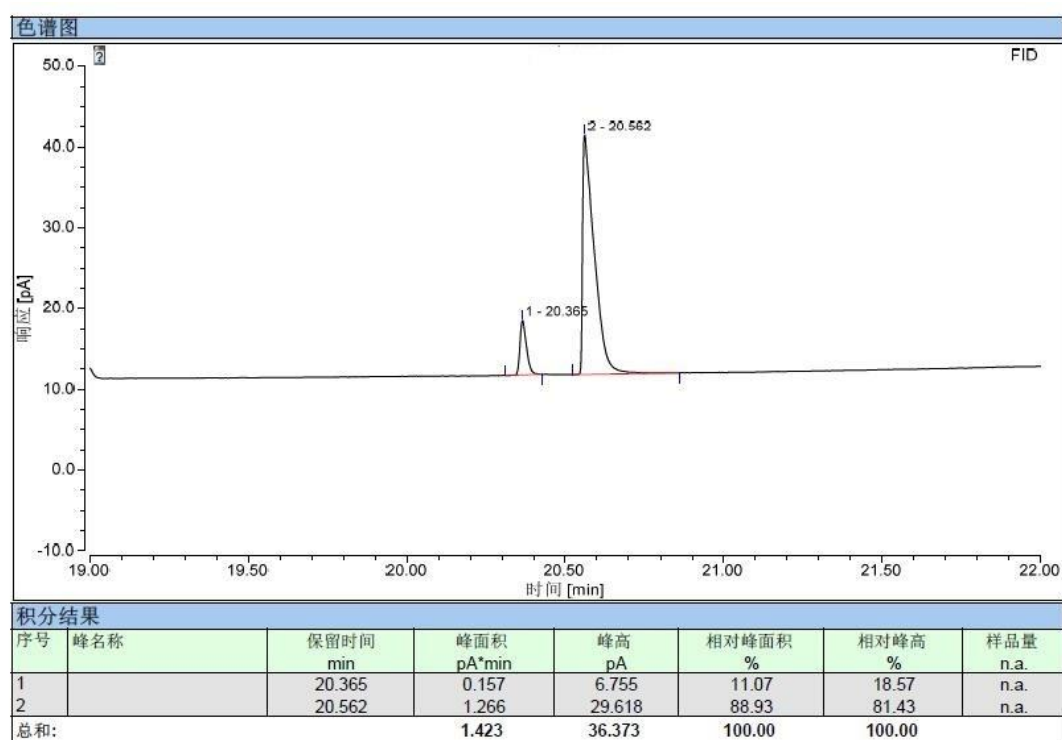

Figure S27. Chiral GC chromatogram of PC after degradation of PPC.

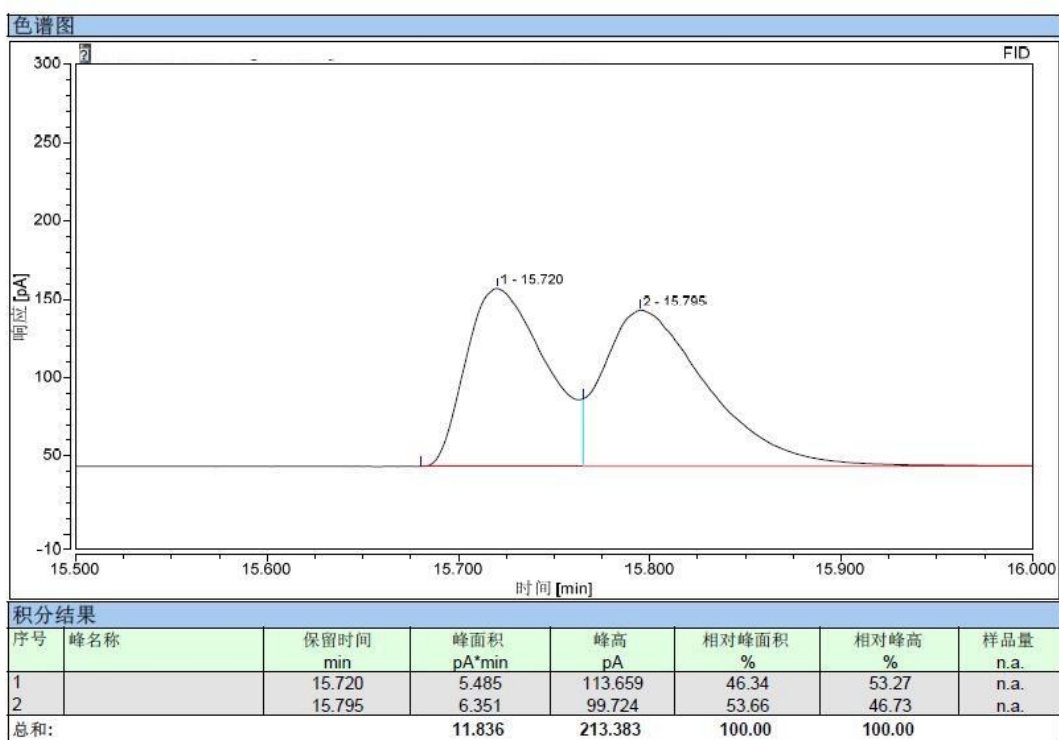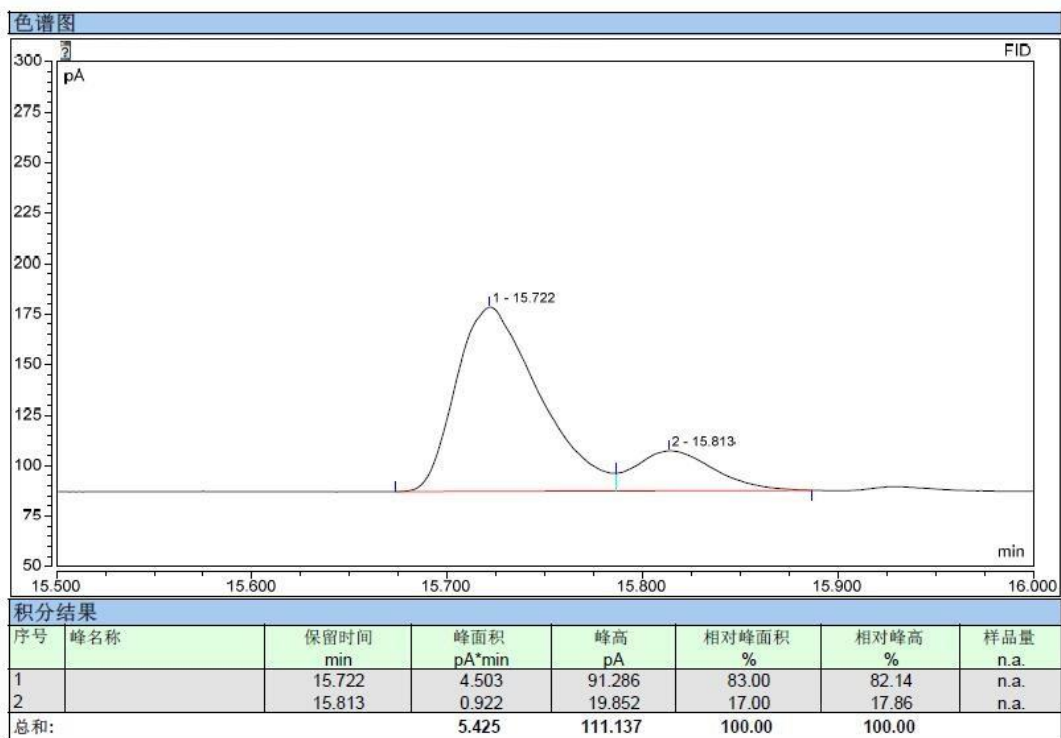

Figure S28. Chiral GC chromatogram of propanediol diacetate from propanediol after degradation of PPS.



## 7. Kinetic study for the copolymerization of PO and SA with 5c/PPNDNP catalyst system

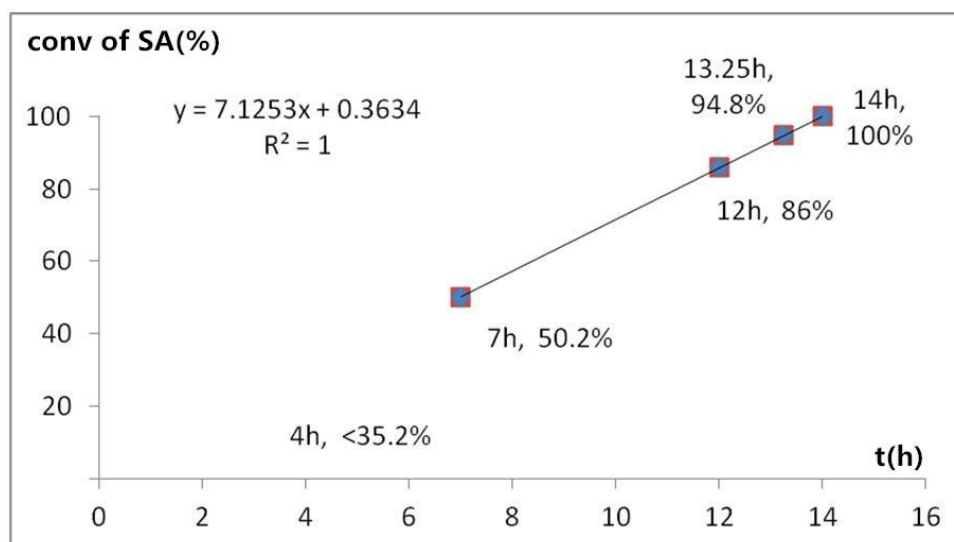

**Figure S29.** Plots of conversion of SA versus time, with the use of 5c/PPNDNP. (Determined by  $^1\text{H}$  NMR spectroscopy. For reaction after 4h, unreacted SA was not fully dissolved in  $\text{CDCl}_3$ )

## 8. NMR spectra of the block polymers

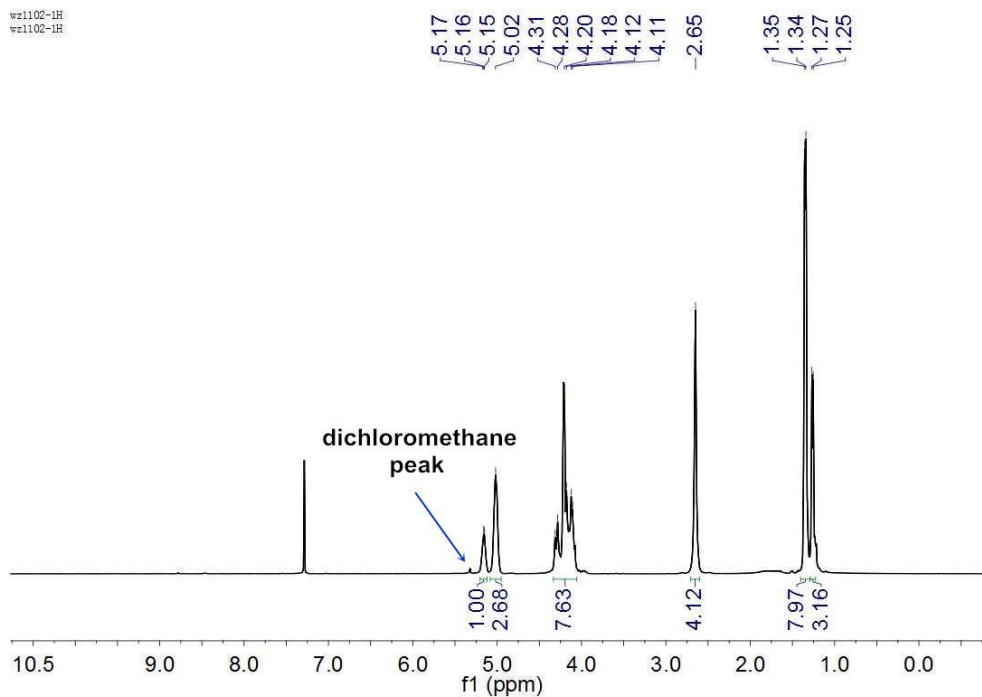

**Figure S30.**  $^1\text{H}$  NMR (400 MHz,  $\text{CDCl}_3$ , 298K) spectrum of block polymer obtained by one-step procedure.

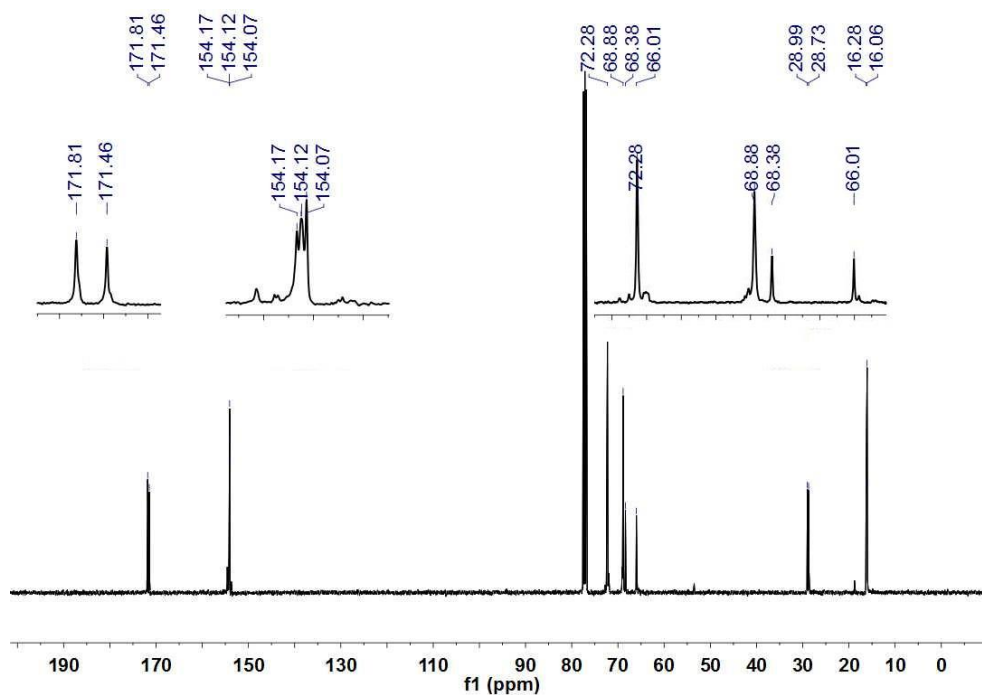

**Figure S31.**  $^{13}\text{C}$  NMR (100 MHz,  $\text{CDCl}_3$ , 298K) spectrum of block polymer obtained by one-step procedure.

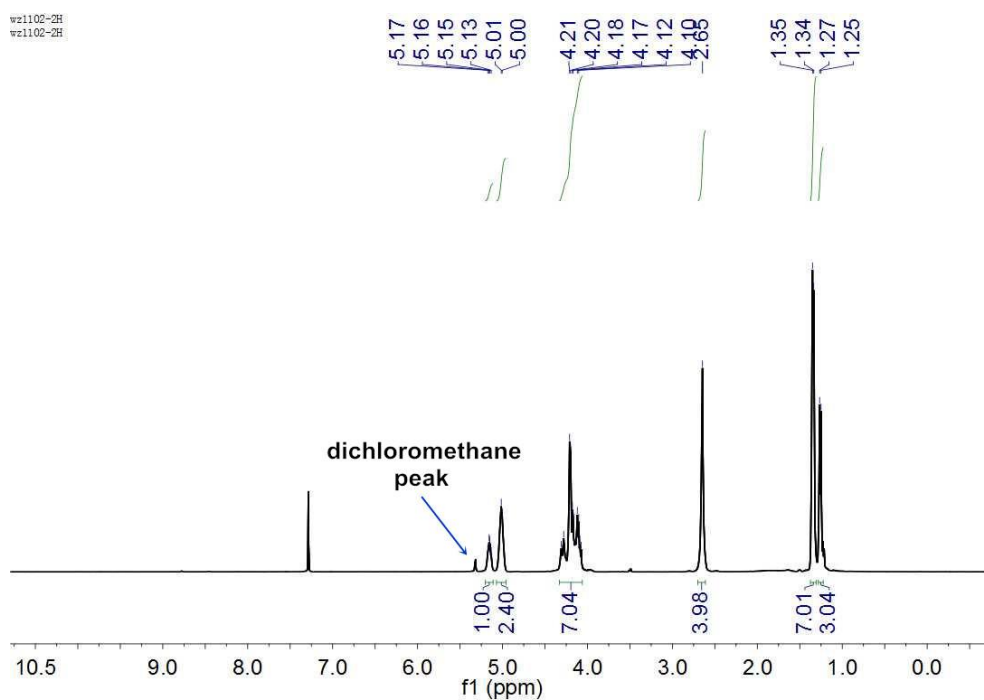

**Figure S32.**  $^1\text{H}$  NMR (400 MHz,  $\text{CDCl}_3$ , 298K) spectrum of block polymer obtained by two-step procedure.

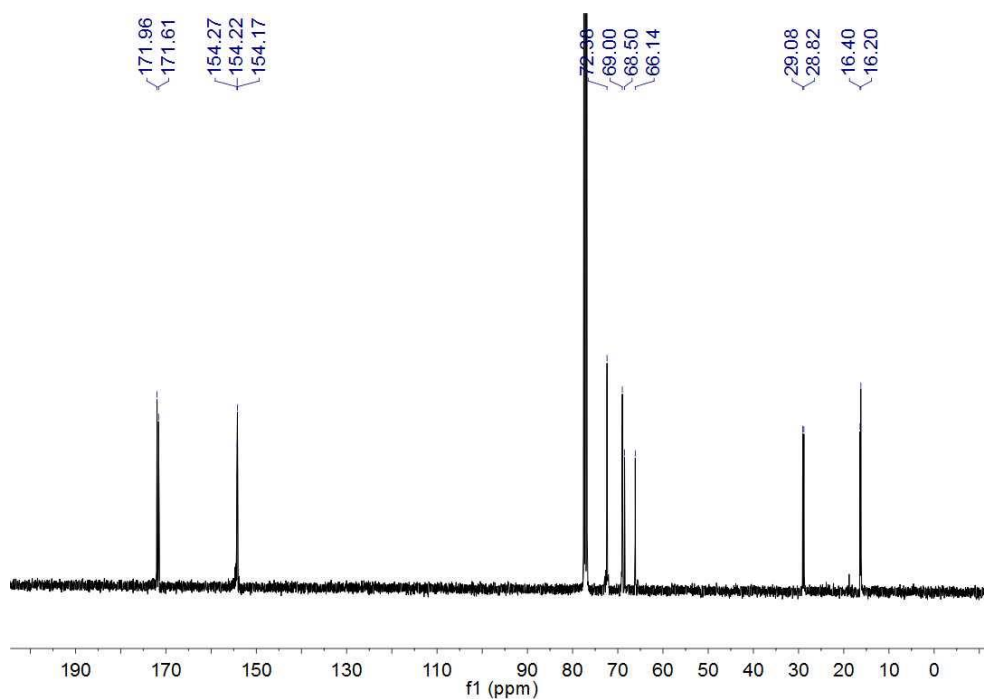

**Figure S33.**  $^{13}\text{C}$  NMR (100 MHz,  $\text{CDCl}_3$ , 298K) spectrum of block polymer obtained by two-step procedure.

## 9. Peaks found in MALDI-TOF-MS spectra and related polymer chains

Table S1. Peaks found in MALDI-TOF-MS spectrum of PPS and related polymer chains.

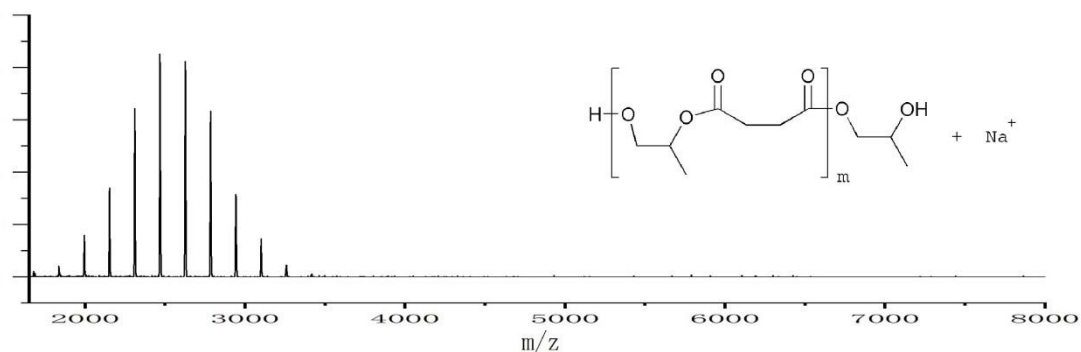

| peak   | structure | peak   | structure | peak   | structure | peak   | structure |
|--------|-----------|--------|-----------|--------|-----------|--------|-----------|
| 1679.4 | m=10      | 2153.4 | m=13      | 2627.4 | m=16      | 3101.1 | m=19      |
| 1836.7 | m=11      | 2311.7 | m=14      | 2784.8 | m=17      | 3261.1 | m=20      |
| 1996.2 | m=12      | 2469.2 | m=15      | 2943.5 | m=18      |        |           |

Table S2. Peaks found in MALDI-TOF-MS spectrum of block polymer obtained by two-step procedure and related polymer chains.

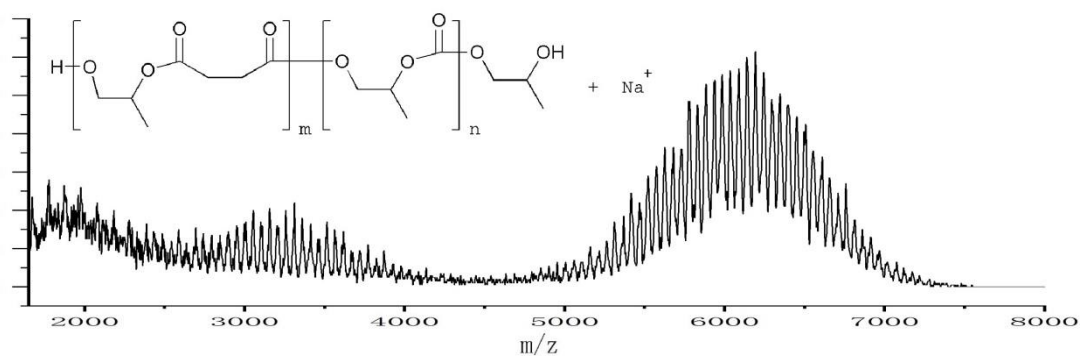

| peak   | structure | peak   | structure  | peak   | structure  |
|--------|-----------|--------|------------|--------|------------|
| 1671.1 | m=8, n=3  | 3256.9 | m=9, n=17  | 5726.8 | m=13, n=35 |
| 1771.3 | m=8, n=4  | 3303.8 | m=8, n=19  | 5774.0 | m=12, n=37 |
| 1873.2 | m=8, n=5  | 3312.3 | m=10, n=16 | 5781.5 | m=14, n=34 |
| 1976.3 | m=8, n=6  | 3359.2 | m=9, n=18  | 5829.4 | m=13, n=36 |
| 2078.5 | m=8, n=7  | 3414.7 | m=10, n=17 | 5883.2 | m=14, n=35 |
| 2182.6 | m=8, n=8  | 3460.9 | m=9, n=19  | 5938.7 | m=15, n=34 |
| 2272.8 | m=6, n=12 | 3469.2 | m=11, n=16 | 5984.8 | m=14, n=36 |
| 2280.7 | m=8, n=9  | 3507.4 | m=8, n=21  | 6036.0 | Unknown    |

|        |            |        |            |        |            |
|--------|------------|--------|------------|--------|------------|
| 2297.2 | Unknown    | 3515.8 | m=10, n=18 | 6088.8 | m=14, n=37 |
| 2385.9 | m=8, n=10  | 3562.3 | m=9, n=20  | 6140.4 | m=15, n=36 |
| 2430.8 | m=7, n=12  | 3571.1 | m=11, n=17 | 6191.2 | m=14, n=38 |
| 2438.7 | m=9, n=9   | 3609.1 | m=8, n=22  | 6244.7 | m=15, n=37 |
| 2486.0 | m=8, n=11  | 3618.0 | m=10, n=19 | 6294.0 | m=14, n=39 |
| 2494.6 | m=10, n=8  | 3665.6 | m=9, n=21  | 6302.8 | m=16, n=36 |
| 2543.0 | m=9, n=10  | 3675.6 | m=11, n=18 | 6346.9 | m=15, n=38 |
| 2587.9 | m=8, n=12  | 3720.2 | m=10, n=20 | 6393.2 | m=14, n=40 |
| 2597.9 | m=10, n=9  | 3772.6 | Unknown    | 6450.0 | m=15, n=39 |
| 2635.0 | m=7, n=14  | 3823.4 | m=10, n=21 | 6496.1 | m=14, n=41 |
| 2696.0 | m=10, n=10 | 3869.6 | m=9, n=23  | 6506.6 | m=16, n=38 |
| 2735.7 | m=7, n=15  | 3925.4 | m=10, n=22 | 6552.4 | m=15, n=40 |
| 2742.8 | m=9, n=12  | 3980.0 | m=11, n=21 | 6609.9 | m=16, n=39 |
| 2791.7 | m=8, n=14  | 4136.9 | m=12, n=21 | 6654.6 | m=15, n=41 |
| 2846.5 | m=9, n=13  | 5159.5 | m=12, n=31 | 6698.9 | m=14, n=43 |
| 2893.6 | m=8, n=15  | 5216.3 | m=13, n=30 | 6710.0 | m=16, n=40 |
| 2905.2 | m=10, n=12 | 5261.8 | m=12, n=32 | 6758.1 | m=15, n=42 |
| 2951.8 | m=9, n=14  | 5309.7 | m=11, n=34 | 6801.8 | m=14, n=44 |
| 2997.1 | m=8, n=16  | 5371.4 | m=14, n=30 | 6811.4 | m=16, n=41 |
| 3006.6 | m=10, n=13 | 5418.1 | m=13, n=32 | 6859.9 | m=15, n=43 |
| 3053.7 | m=9, n=15  | 5467.2 | m=12, n=34 | 6913.6 | m=16, n=42 |
| 3100.4 | m=8, n=17  | 5521.1 | m=13, n=33 | 6958.3 | m=15, n=44 |
| 3110.4 | m=10, n=14 | 5575.7 | m=14, n=32 | 6968.6 | m=17, n=41 |
| 3155.1 | m=9, n=16  | 5626.0 | m=13, n=34 | 7015.0 | m=16, n=43 |
| 3201.6 | m=8, n=18  | 5670.5 | m=12, n=36 | 7073.4 | m=17, n=42 |
| 3212.4 | m=10, n=15 | 5679.8 | m=14, n=33 | 7118.1 | m=16, n=44 |

## 10. Low molecular weight region of MALDI-TOF-MS spectra of the polymers

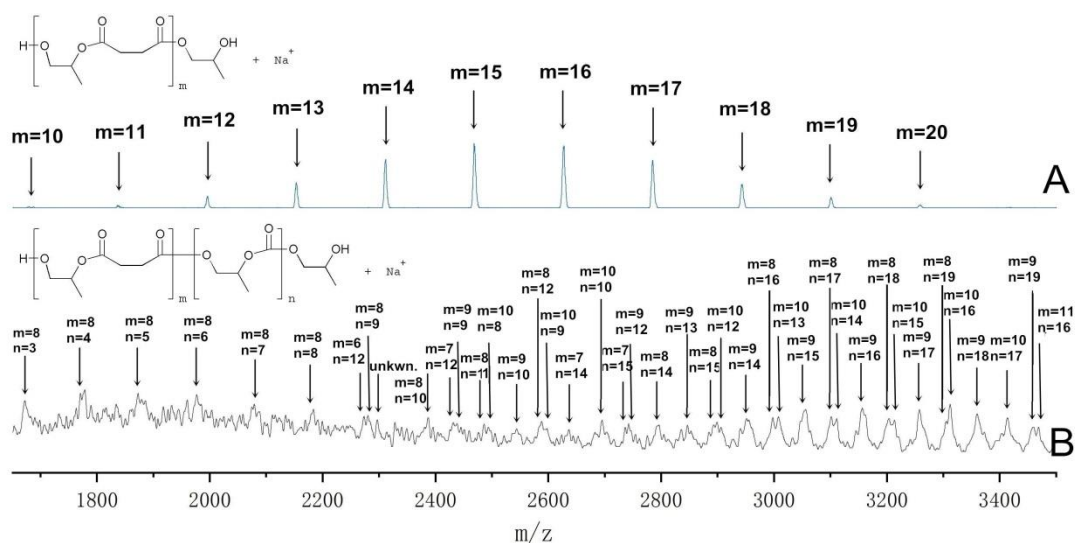

**Figure S34.** Low molecular weight region of MALDI-TOF-MS spectra of the PPS (A) and block polymer obtained by the two-step procedure (B).

### Reference:

1. R. Kowalczyk, P. Kwiatkowski, J. Skarzewski and J. Jurczak, *J. Org. Chem.*, 2009, **74**, 753-756.
2. V. Busico, R. Cipullo, R. Pellecchia, S. Ronca, G. Roviello and G., Talarico, *Proc. Natl. Acad. Sci. U.S.A.*, 2006, **103**, 15321-15326.
3. C. Zeng, D. Yuan, B. Zhao and Y. Yao, *Org. Lett.*, 2015, **17**, 2242-2245.
4. (a) N. U. Hofslkken and L. Skattebl, *Acta. Chem. Scand.*, 1999, **53**, 258-262; (b) T. V. Hansen and L. Skattebøl, *Tetrahedron Lett.*, 2005, **46**, 3829-3830.
